# Supplementary material
Source: publisher figshare collection journal article supplement (https://acs.figshare.com/ndownloader/files/3886207)
Supplement: Supplementary file 1 [file 3886207]

**Supporting Information**

**Theoretical Study on Conformation Dynamics of Three-Station  
Molecular Shuttle in Different Environments and its Influence on  
NMR Chemical Shifts and Binding Interactions**

Pingying Liu<sup>a,b</sup>, Wei Li<sup>a</sup>, Li Liu<sup>a</sup>, Leyong Wang<sup>a</sup> and Jing Ma<sup>a,\*</sup>

<sup>a</sup>School of Chemistry and Chemical Engineering, Key Laboratory of Mesoscopic Chemistry of MOE, Nanjing University, Nanjing 210093, People's Republic of China

<sup>b</sup>School of Materials Science and Engineering, Jingdezhen Ceramic Institute, Jingdezhen 333403, China

\*Corresponding author: majing@nju.edu.cn, Fax: 86-25-83596131, Tel: 86-25-83597408

**Contents**

|                                                                                                                                                                                                                                                                                  |           |
|----------------------------------------------------------------------------------------------------------------------------------------------------------------------------------------------------------------------------------------------------------------------------------|-----------|
| <b>1. DFT computational details.</b>                                                                                                                                                                                                                                             | <b>S3</b> |
| <b>2. Table S1 for the MD simulation details.</b>                                                                                                                                                                                                                                | <b>S4</b> |
| <b>3. Figure S1 for the calculated BSSE-binding energies and electrostatic potential maps of macrocycles and threads at M06-2X/6-31G(d, p) level based on the ten energetically low-lying conformations extracted for MD simulation of interlocked [2]rotaxane at Station I.</b> | <b>S5</b> |
| <b>4. Figure S2. The optimized geometries for three stations with six different functionals.</b>                                                                                                                                                                                 | <b>S6</b> |
| <b>5. Figure S3. The optimized geometries for pseudorotaxanes at B3LYP/6-31G (d, p) level.</b>                                                                                                                                                                                   | <b>S7</b> |
| <b>6. Table S2 for hydrogen bond lengths, <math>d_{O...H}</math>, and stabilization energies obtained from second order perturbation, <math>E^{(2)}</math>, for H-bonding interactions of [2]rotaxane interlocking at different stations based on the NBO analysis.</b>          | <b>S8</b> |
| <b>7. Figure S4. The calculated <math>^1H</math> NMR chemical shifts for two degenerate</b>                                                                                                                                                                                      |           |

- molecular shuttle conformations (binding at Station I). S9
8. Figure S5 for MD trajectories of molecular shuttle binding at Station I in different solvents. S10
9. Figure S6 for the molecular shuttle binding at Station I: (a) comparison of the differences of computed  $^1\text{H}$  NMR chemical shifts using different DFT functionals with 6-31G (d, p) basis set with respect to the M06-2X functional results.(b)convergence test (along MD trajectory) of the calculated NMR chemical shifts of the protons attaching at Station I. S11
10. Table S3 for the calculated  $^1\text{H}$  NMR chemical shifts with PCM model and explicit solvent model (MD ensemble-average) for molecular shuttle binding at station I at M06-2X/6-31G(d, p) level. S12
11. Figure S7 for the radial distribution function of 1ns snapshot of MD simulation of Station I. S13

## 1. DFT functionals

All the structures were optimized using the density functional theory (DFT)<sup>1</sup> method with 6-31G(d,p)<sup>2</sup> basis sets. The B3LYP functional includes Becke's three-parameter-exchange functional and Lee-Young-Parr correlation functional<sup>3</sup>, CAM-B3LYP<sup>4</sup> is the long range corrected version of B3LYP using the Coulomb-attenuating method, PBEPBE<sup>5</sup>, uses 25% exchange and 75% correlation weighting. mPW1PW91<sup>6</sup> uses Perdew-Wang exchange as modified by Adamo and Barone combined with PW91 correlation. M06-2X<sup>7</sup> is a hybrid meta-functional that contains 27% HF exchange, parameterized using delocalized system, and WB97X-D<sup>8</sup> includes empirical dispersion and long range corrections.

### reference:

1. P. Hohenberg, W. Kohn, Phys. Rev. **1964**, 136B, 864-871.
2. M.M. Franchl, W.J. Pietro, W.J. Hehre, J.S. Binkley, M.S. Gordon, D.J. DeFrees, J.A. Pople J. Chem. Phys. **77**, 3654-3665 (1982).
3. a) A. D. Becke, J. Chem. Phys. **1993**, **98**, 5648-5652. b) C. Lee, W. Yang, R. G. Parr, Phys. Rev. B **1988**, **37**, 785-789. c) R.G., Parr, W. Yang, Density Functional Theory of Atoms and Molecules, Oxford, New York, **1989**.
4. T. Yanai, D. Tew, and N. Handy, "A new hybrid exchange-correlation functional using the Coulomb-attenuating method (CAM-B3LYP)," *Chem. Phys. Lett.*, **393** (2004) 51-57.
5. (a) C. Adamo and V. Barone, "Toward reliable density functional methods without adjustable parameters: The PBE0 model," *J. Chem. Phys.*, **110** (1999) 6158-69 (b) J. P. Perdew, K. Burke, and M. Ernzerhof, "Generalized gradient approximation made simple," *Phys. Rev. Lett.*, **77** (1996) 3865-68. (c) J. P. Perdew, K. Burke, and M. Ernzerhof, "Errata: Generalized gradient approximation made simple," *Phys. Rev. Lett.*, **78** (1997) 1396.
6. C. Adamo and V. Barone, "Exchange functionals with improved long-range behavior and adiabatic connection methods without adjustable parameters: The mPW and mPW1PW models," *J. Chem. Phys.*, **108** (1998) 664-75.
7. Y. Zhao and D. G. Truhlar, "The M06 suite of density functionals for main group thermochemistry, thermochemical kinetics, noncovalent interactions, excited states, and transition elements: two new functionals and systematic testing of four M06-class functionals and 12 other functionals," *Theor. Chem. Acc.*, **120** (2008) 215-41.
8. J.-D. Chai and M. Head-Gordon, "Long-range corrected hybrid density functionals with damped atom-atom dispersion corrections," *Phys. Chem. Chem. Phys.*, **10** (2008) 6615-20.

Table S1. The details for the solvent models used in molecular dynamics simulations.

|                    | MD averaged | MD@CD <sub>3</sub> CN-CDCl <sub>3</sub> | MD@CDCl <sub>3</sub> | MD@    | MD@mix   |
|--------------------|-------------|-----------------------------------------|----------------------|--------|----------|
|                    | @solution   | solvents                                | solvents             | vacuum | solvents |
| Solute             | 1           | 1                                       | 1                    | 1      | 1        |
| Solvents           |             |                                         |                      |        |          |
| CD <sub>3</sub> CN | 1777        | 1777                                    | 0                    | 0      | 1777     |
| CDCl <sub>3</sub>  | 1223        | 1223                                    | 3000                 | 0      | 1223     |

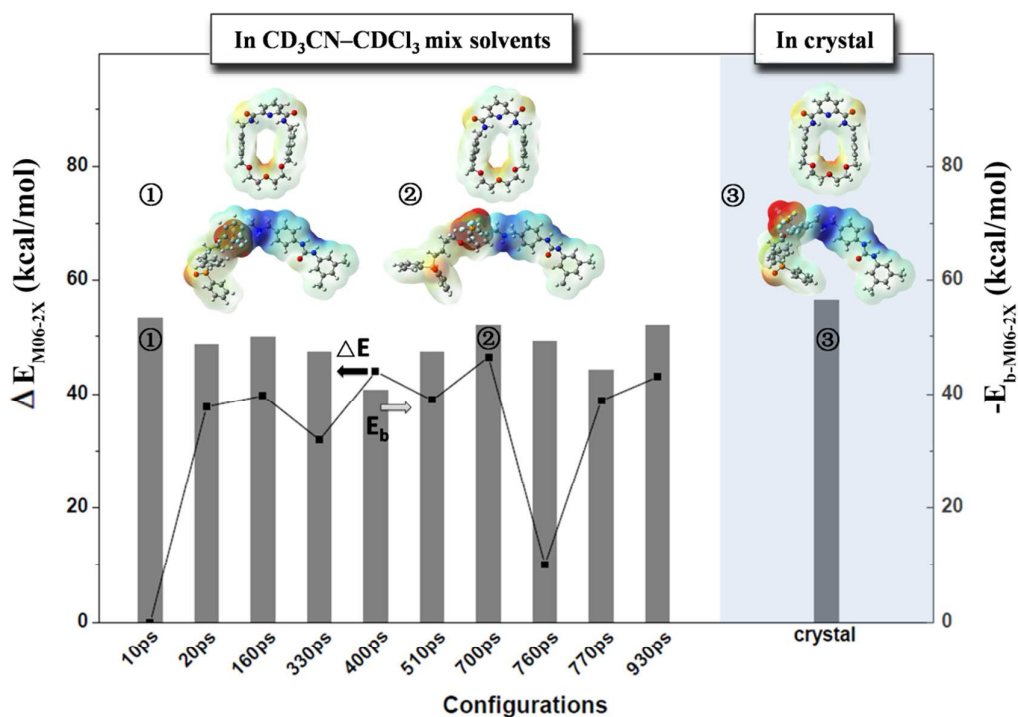

Figure S1. The relative energy,  $\Delta E_{M06-2X}$ , and BSSE-binding energies,  $-E_{b-M06-2X}$ , and electrostatic potential maps of macrocycles and threads at M06-2X/6-31G(d, p) level based on the ten energetically low-lying conformations extracted from MD simulation of interlocked [2]rotaxane at Station I. The 10ps structure has the lowest energy with  $\Delta E_{M06-2X}=0$ . Computational results using the crystal structure were also given for comparison.

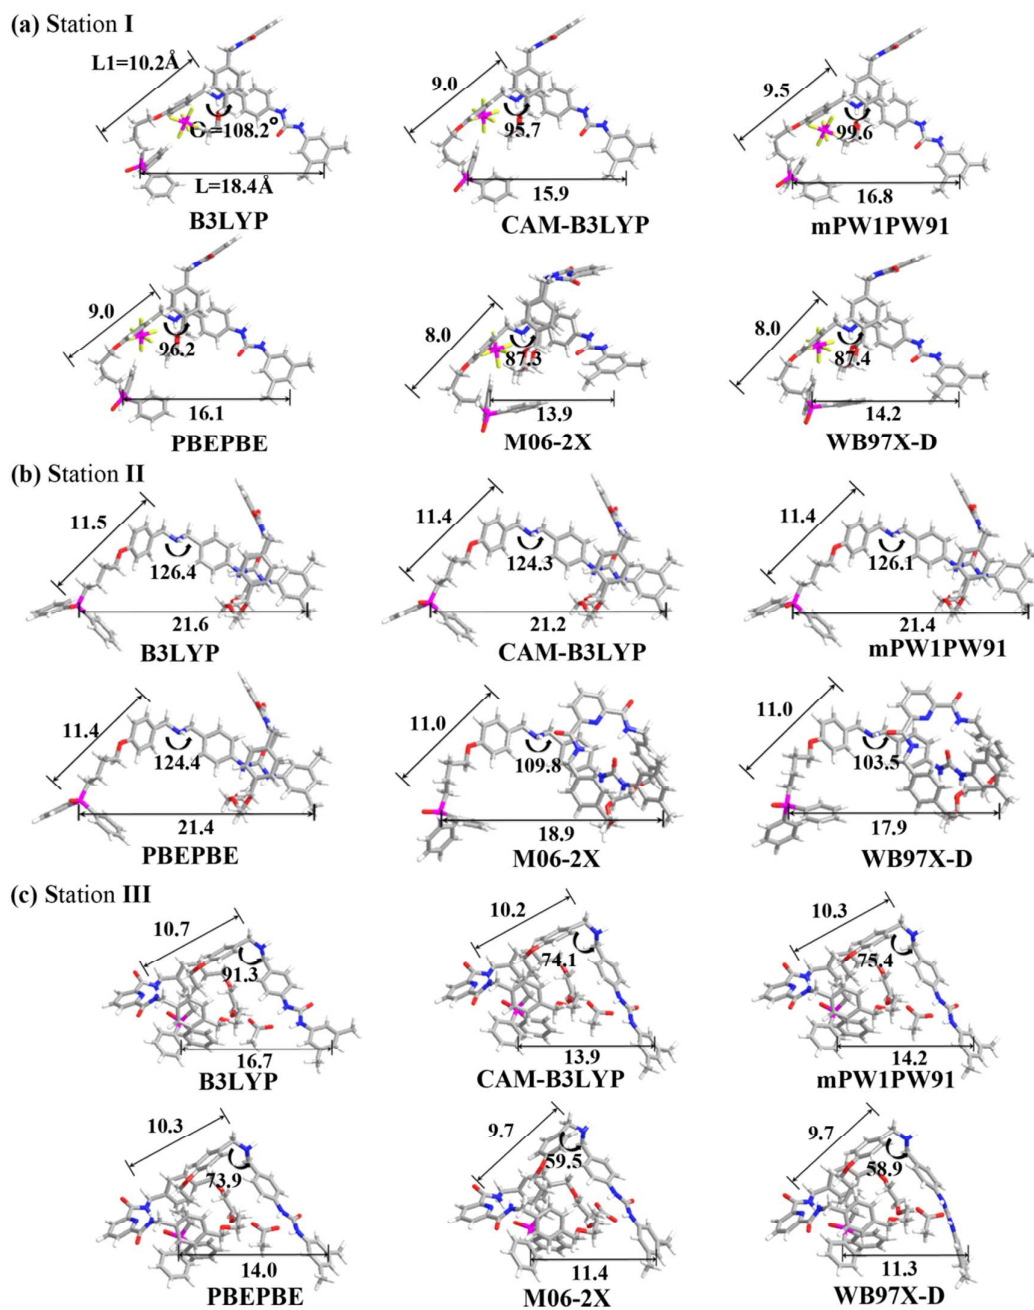

Figure S2. The optimized geometries and geometrical parameters of thread for three stations with six different functionals.

## Pseudorotaxane

(a) DBA<sup>+</sup>- based(Station I)

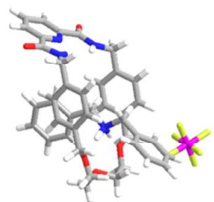

(b) Urea-based(Station II)

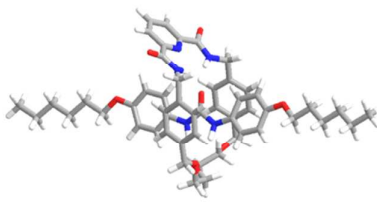

(c) Phosphine oxide-based(Station III)

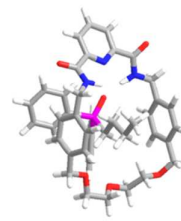

Figure S3. The optimized geometries for pseudorotaxanes at M062X/6-31G (d, p) level.

Table S2. Hydrogen bond lengths,  $d_{O...H}$ , and stabilization energies obtained from second order perturbation,  $E^{(2)}$ , for H-bonding interactions of [2]rotaxane interlocking at different stations based on the NBO analysis.

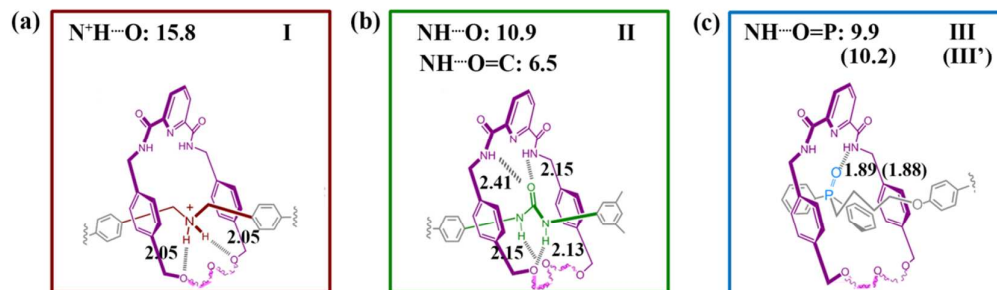

|                | Donor | Type   | Acceptor  | Type   | $d_{O...H}$ (Å) | Interaction                      | $E^{(2)}$ (kcal/mol) |
|----------------|-------|--------|-----------|--------|-----------------|----------------------------------|----------------------|
| <b>I-HB1</b>   | O 151 | LP (2) | N83 – H85 | BD*(1) | 2.05            | $n_O \rightarrow \sigma_{N-H}^*$ | 7.58                 |
| <b>I-HB2</b>   | O 153 | LP (2) | N83 – H84 | BD*(1) | 2.05            | $n_O \rightarrow \sigma_{N-H}^*$ | 7.80                 |
| <b>I-HB3</b>   | O 152 | LP (2) | C22 – H23 | BD*(1) | 2.32            | $n_O \rightarrow \sigma_{CH}^*$  | 1.08                 |
| <b>II-HB1</b>  | O50   | LP (1) | N130-H131 | BD*(1) | 2.13            | $n_O \rightarrow \sigma_{N-H}^*$ | 7.19                 |
| <b>II-HB2</b>  | O57   | LP (2) | N126-H127 | BD*(1) | 2.15            | $n_O \rightarrow \sigma_{N-H}^*$ | 3.73                 |
| <b>II-HB3</b>  | O129  | LP (2) | N14-H150  | BD*(1) | 2.15            | $n_O \rightarrow \sigma_{N-H}^*$ | 5.08                 |
| <b>II-HB4</b>  | O129  | LP (2) | N15-H16   | BD*(1) | 2.41            | $n_O \rightarrow \sigma_{N-H}^*$ | 1.43                 |
| <b>III-HB1</b> | O90   | LP (1) | N14-H150  | BD*(1) | 1.89            | $n_O \rightarrow \sigma_{N-H}^*$ | 9.88                 |



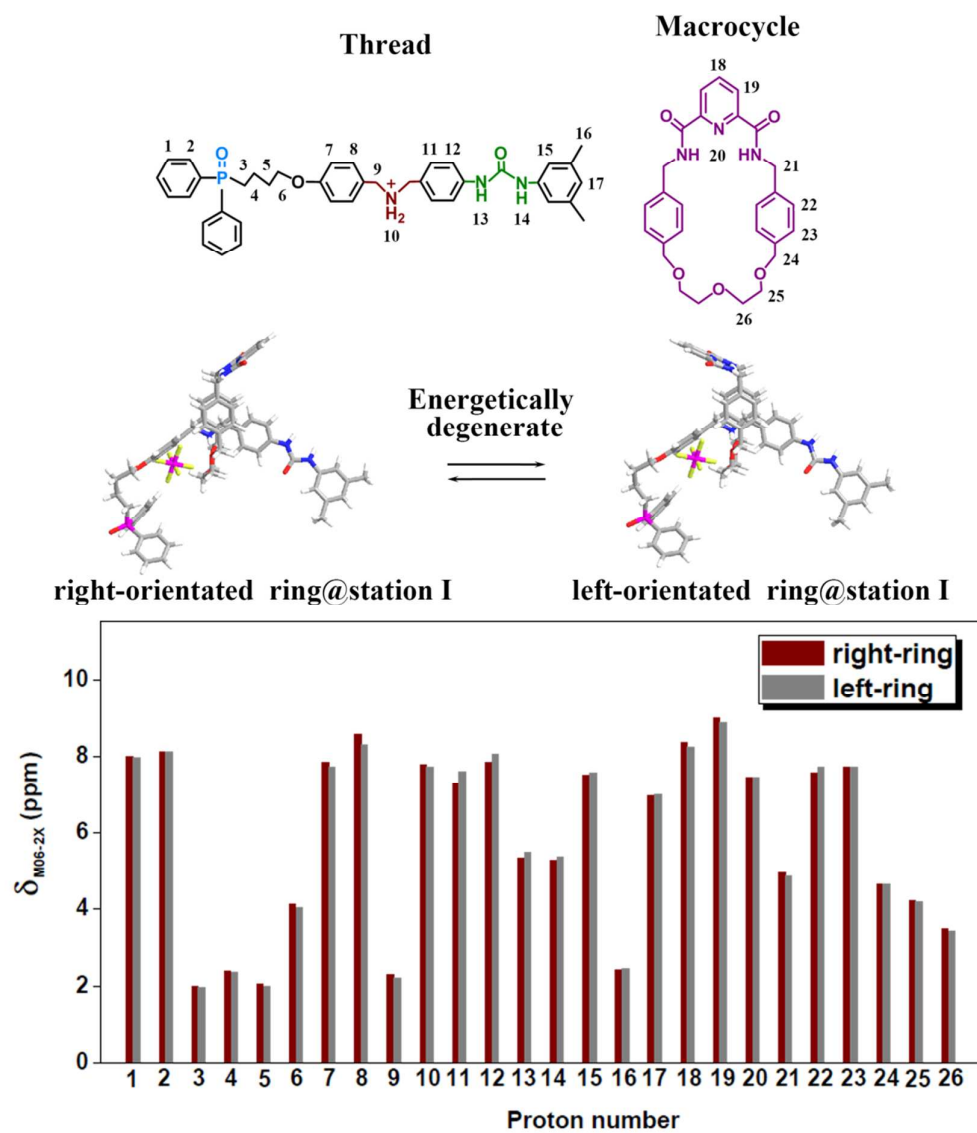

Figure S4. The calculated  $^1\text{H}$  NMR chemical shifts for two degenerate molecular shuttle conformations (binding at Station I).

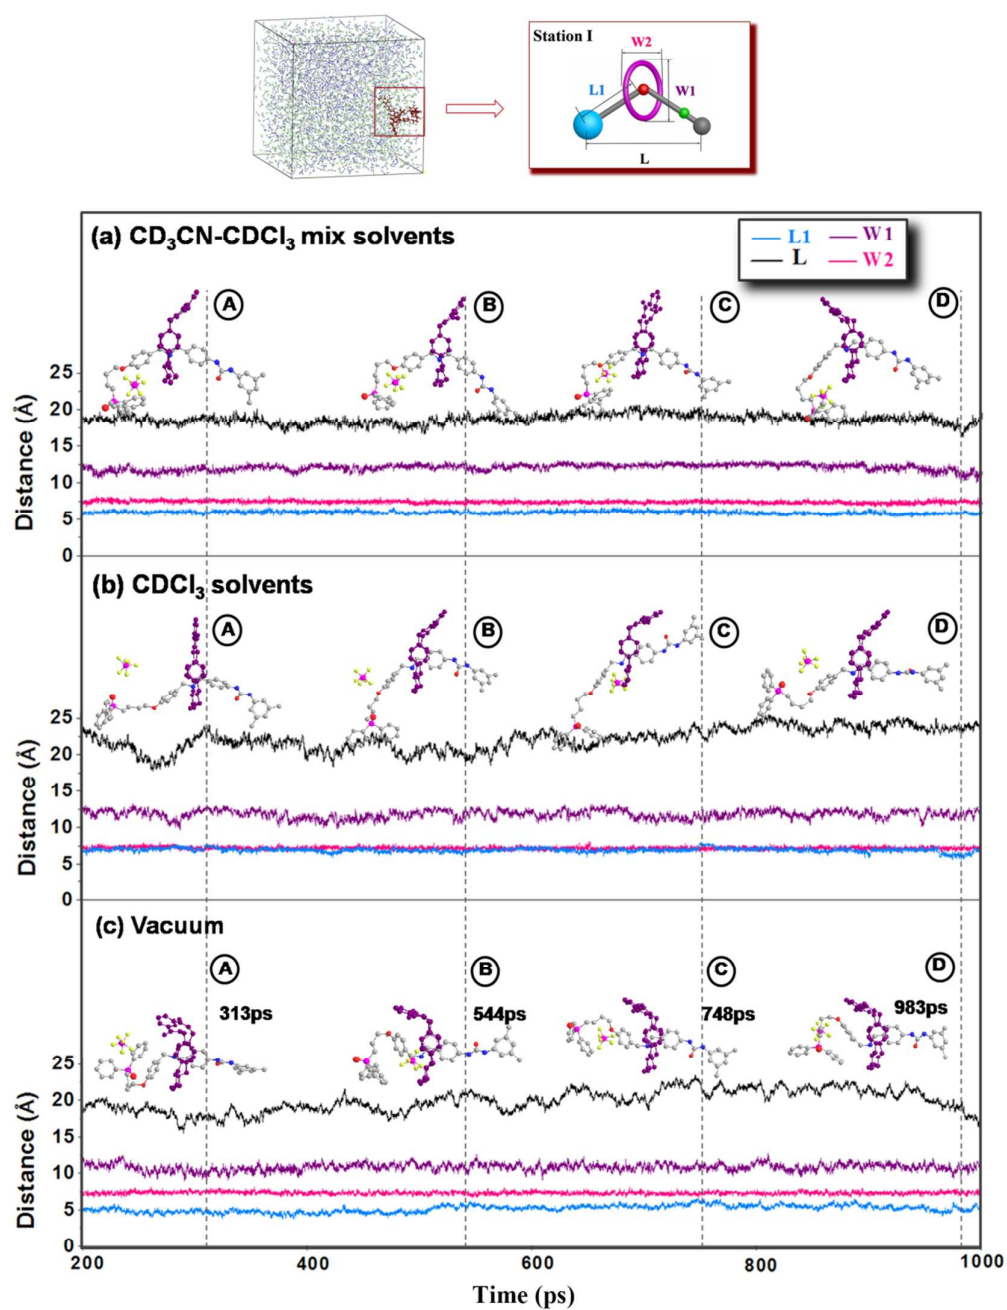

Figure S5. MD trajectories of molecular shuttle binding at Station I in (a)  $\text{CD}_3\text{CN}-\text{CDCl}_3$  mix solvents (b) nonpolar  $\text{CDCl}_3$  solvents (c) vacuum without any solvents.

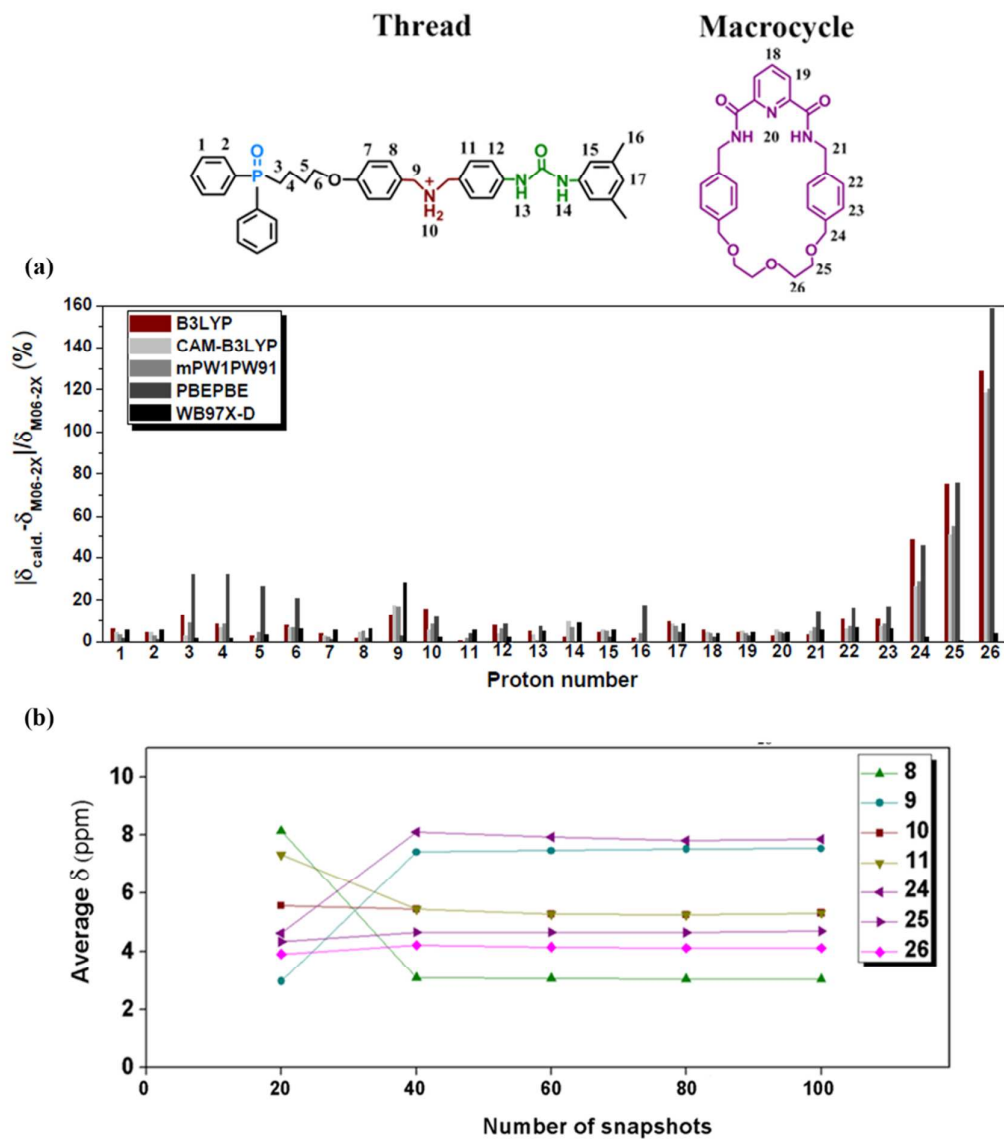

Figure S6. For the molecular shuttle binding at Station **I**: (a) comparison of the differences of computed  $^1\text{H}$  NMR chemical shifts using different DFT functionals with 6-31G (d, p) basis set with respect to the M06-2X functional results; (b) convergence test (along MD trajectory) of the calculated NMR chemical shifts of the protons attaching at Station **I**.

Table S3. The calculated  $^1\text{H}$  NMR chemical shifts with PCM model and explicit solvent model (MD ensemble-average) for molecular shuttle binding at Station **I** at M06-2X/6-31G(d, p) level.

| NO.H      | PCM<br>solvent=CH <sub>3</sub> CN | PCM<br>solvent=CHCl <sub>3</sub> | Solu. <sup>MD</sup> | Exp. |
|-----------|-----------------------------------|----------------------------------|---------------------|------|
| <b>1</b>  | 8.82                              | 8.70                             | 8.70                | 7.54 |
| <b>2</b>  | 8.90                              | 8.86                             | 9.07                | 7.76 |
| <b>3</b>  | 3.97                              | 3.85                             | 2.47                | 2.37 |
| <b>4</b>  | 3.03                              | 3.20                             | 2.47                | 1.78 |
| <b>5</b>  | 2.78                              | 2.71                             | 2.49                | 1.85 |
| <b>6</b>  | 5.14                              | 5.19                             | 4.54                | 3.91 |
| <b>7</b>  | 8.52                              | 8.50                             | 8.53                | 6.65 |
| <b>8</b>  | 9.28                              | 9.16                             | 8.44                | 6.95 |
| <b>9</b>  | 3.98                              | 3.87                             | 2.95                | 2.50 |
| <b>10</b> | 6.46                              | 6.50                             | 5.24                | 7.20 |
| <b>11</b> | 8.50                              | 8.42                             | 8.10                | 6.96 |
| <b>12</b> | 8.54                              | 8.52                             | 8.46                | 7.36 |
| <b>13</b> | 4.91                              | 4.69                             | 5.20                | 7.51 |
| <b>14</b> | 6.03                              | 5.76                             | 5.03                | 7.27 |
| <b>15</b> | 8.16                              | 8.12                             | 7.87                | 7.03 |
| <b>16</b> | 2.5                               | 2.49                             | 2.72                | 2.25 |
| <b>17</b> | 8.37                              | 8.34                             | 7.75                | 6.66 |
| <b>18</b> | 9.44                              | 9.42                             | 9.30                | 8.17 |
| <b>19</b> | 9.34                              | 9.38                             | 9.43                | 8.43 |
| <b>20</b> | 9.29                              | 9.04                             | 7.73                | 9.01 |
| <b>21</b> | 4.95                              | 4.93                             | 5.16                | 4.65 |
| <b>22</b> | 8.57                              | 8.52                             | 8.51                | 7.08 |
| <b>23</b> | 8.26                              | 8.26                             | 8.56                | 6.83 |
| <b>24</b> | 4.99                              | 4.96                             | 4.62                | 4.21 |
| <b>25</b> | 3.92                              | 3.89                             | 4.04                | 3.59 |
| <b>26</b> | 4.65                              | 4.71                             | 4.02                | 3.25 |

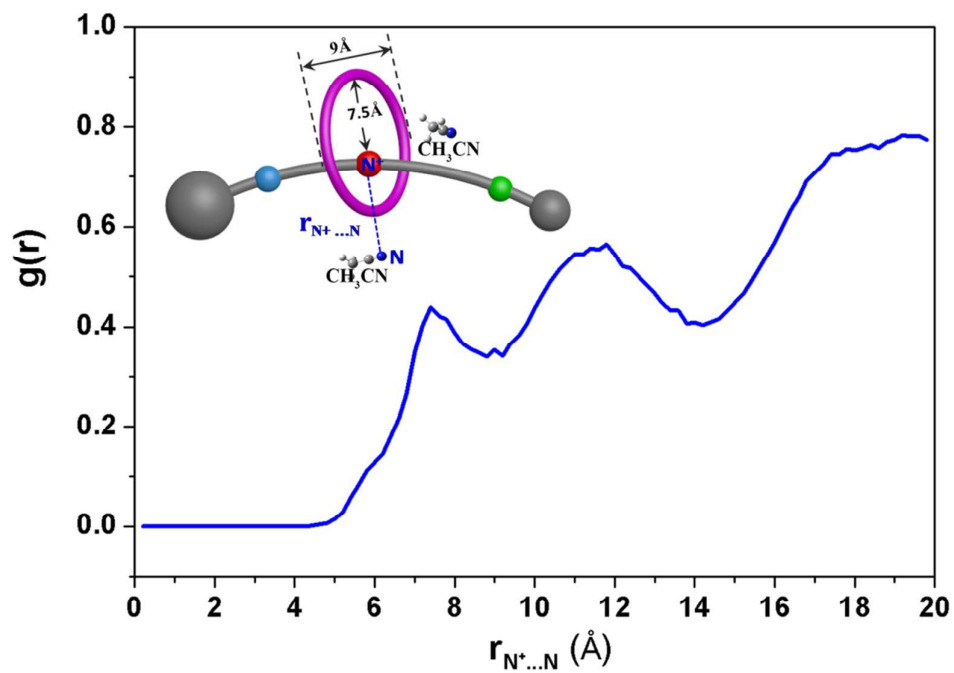

Figure S7. The radial distribution function of 1ns snapshot of MD simulation of Station I.
